# Supplementary material for: Association Analysis of the Lymphocyte-Specific Protein Tyrosine Kinase (LCK) Gene in Type 1 Diabetes
Source: Oxford University Press journal article supplement (doi:10.2337/diabetes.53.9.2479), 2004-09-01
Supplement: 2479-sup-1121_appendix_1.doc [file 2479-sup-1121_appendix_1.doc]

Appendix 1

**Power of the Single-Stage Compared to the Two-Stage Genotyping Approach.**

|  |  | **Power for required overall type 1 error rate:** | | |
| --- | --- | --- | --- | --- |
|  |  | **P = 0.0001** | **P = 0.2** | **P = 0.0001** |
| Relative | Minor Allele | Single-stage design | Two-stage design  Stage 1 | Two-stage design  Stage 1 and 2 combined |
| Risk | Frequency (%) | 2430 families | 722 families | 2430 families |
|  |  |  |  |  |
|  | 3 | 10% | 68% | 10% |
| **1.3** | 5 | 29% | 82% | 29% |
|  | 10 | 75% | 96% | 74% |
|  |  |  |  |  |
|  | 3 | 32% | 84% | 32% |
| **1.4** | 5 | 68% | 95% | 68% |
|  | 10 | 98% | 100% | 98% |
|  |  |  |  |  |
|  | 3 | 61% | 93% | 61% |
| **1.5** | 5 | 92% | 99% | 92% |
|  | 10 | 100% | 100% | 100% |
|  |  |  |  |  |
|  | 3 | 85% | 98% | 84% |
| **1.6** | 5 | 100% | 100% | 99% |
|  | 10 | 100% | 100% | 100% |

The study was designed to detect an association with an overall type 1 error rate of 0.0001, the correction for the two-stage design has a minimal effect and there is very little loss of power, never more than a percentage point (Table above).

* The relative risk is that bestowed by each copy of the causal allele.
